# Supplementary material for: General and sex-specific effects of vitamin D against atrial fibrillation and young-onset ischemic stroke: a Mendelian randomization series
Source: PubMed Central journal article supplement — J Clin Biochem Nutr. 2024 Jul 12;75(3):228–36. doi: 10.3164/jcbn.24-79 (PMC11579857; doi:10.3164/jcbn.24-79), 2024-07-12
Supplement: jcbn24-79SF01.pdf [file jcbn24-79SF01.pdf]

Paralleled series I

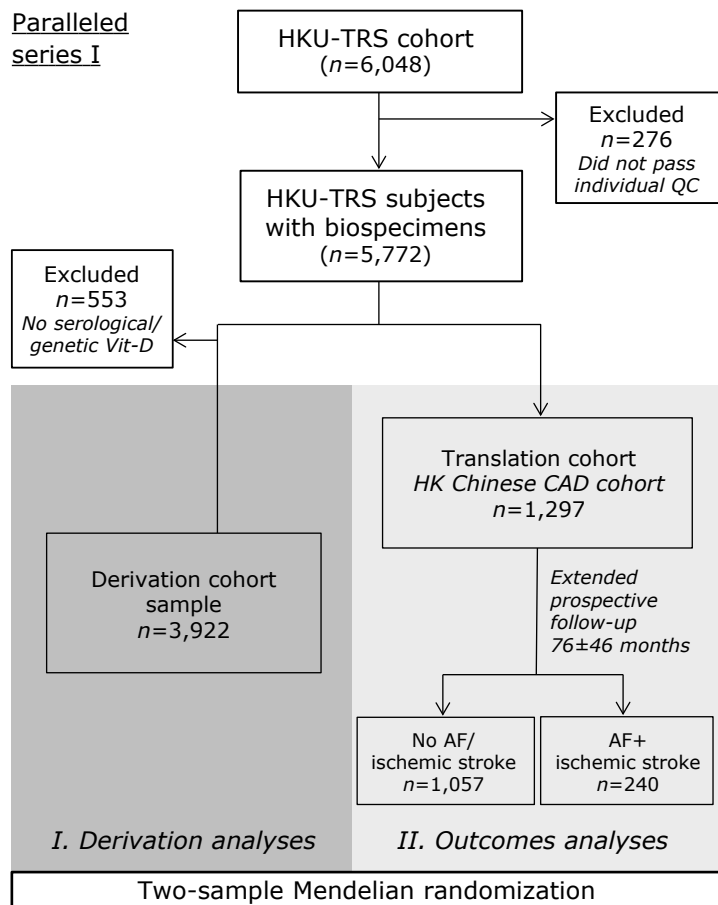

Paralleled series II

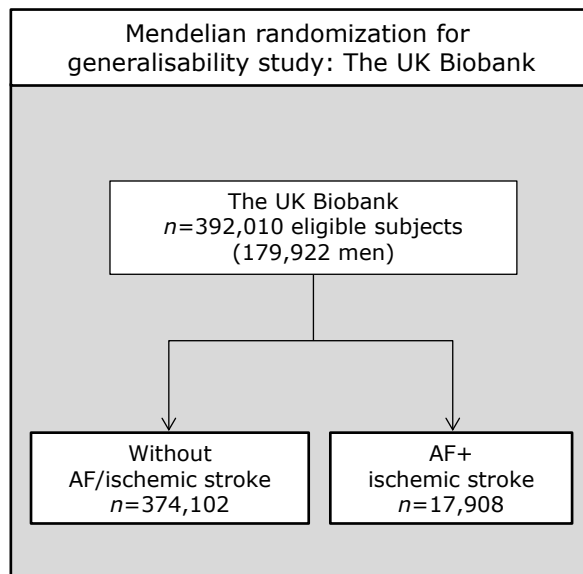

**Supplemental Fig. 1.** Study flowchart. Flowchart detailing the study design of the Mendelian randomization series, including the HKU-TRS Cohort Study and the UK Biobank.
