# Supplementary material for: General and sex-specific effects of vitamin D against atrial fibrillation and young-onset ischemic stroke: a Mendelian randomization series
Source: PubMed Central journal article supplement — J Clin Biochem Nutr. 2024 Jul 12;75(3):228–36. doi: 10.3164/jcbn.24-79 (PMC11579857; doi:10.3164/jcbn.24-79), 2024-07-12
Supplement: jcbn24-79ST01.pdf [file jcbn24-79ST01.pdf]

**Supplemental Table 1.** Prediction estimates of genetic variants of vitamin D mechanistic pathways for serum 25-hydroxyvitamin D in the HKU-TRS derivation cohort

| Pathway mechanistic relevance/loci of interest | SNP                                | R <sup>2</sup> (%) | F-statistic | p value |
|------------------------------------------------|------------------------------------|--------------------|-------------|---------|
| Vitamin D biosynthesis                         |                                    |                    |             |         |
| CYP27B1                                        | <i>rs4646536</i>                   | 0.1                | 2.6         | 0.11    |
| CYP27B1                                        | <i>rs10877012</i>                  | 0                  | 1.7         | 0.19    |
| NADSYN1/DHCR7                                  | <i>rs3829251</i>                   | 0.1                | 2           | 0.15    |
| NADSYN1/DHCR7                                  | <i>rs1790349</i>                   | 0.1                | 3.8         | 0.05    |
| Vitamin D activation                           |                                    |                    |             |         |
| CYP2R1                                         | <i>rs2060793</i> <sup>#</sup>      | 0.1                | 4.1         | 0.044*  |
| CYP2R1                                         | <i>rs1993116</i>                   | 0.1                | 3.9         | 0.049*  |
| Vitamin D-binding protein                      |                                    |                    |             |         |
| GC                                             | <i>rs2282679</i>                   | 1.4                | 56.5        | <0.001* |
| GC                                             | <i>rs4588</i> <sup>#</sup>         | 1.4                | 57.3        | <0.001* |
| GC                                             | <i>rs1155563</i>                   | 0.5                | 21.5        | <0.001* |
| GC                                             | <i>rs7041</i> <sup>#</sup>         | 0.5                | 17.7        | <0.001* |
| Vitamin D receptor                             |                                    |                    |             |         |
| VDR                                            | <i>rs1544410</i>                   | 0                  | 0.6         | 0.43    |
| VDR                                            | <i>rs10735810</i> <sup>†</sup>     | 0                  | 0.6         | 0.45    |
| Genetic risk score (GRS) <sup>‡</sup>          | <i>rs2060793 + rs4588 + rs7041</i> | 1.3                | 50.5        | <0.001* |

<sup>#</sup>Constituent genetic polymorphisms for genetic risk score. <sup>†</sup>Merged into *rs2228570*. <sup>‡</sup>GRS construction based on multi-loci inclusion of genetic variants with the greatest resultant F-Statistic and absence of linkage disequilibrium of constituent variants (refer to Supplemental Table 2).
