# Supplementary material for: General and sex-specific effects of vitamin D against atrial fibrillation and young-onset ischemic stroke: a Mendelian randomization series
Source: PubMed Central journal article supplement — J Clin Biochem Nutr. 2024 Jul 12;75(3):228–36. doi: 10.3164/jcbn.24-79 (PMC11579857; doi:10.3164/jcbn.24-79), 2024-07-12
Supplement: jcbn24-79ST02.pdf [file jcbn24-79ST02.pdf]

**Supplemental Table 2.** Linkage analyses between candidate constituent genetic variants for vitamin D prediction, in the HKU-TRS derivation cohort ( $n = 3,922$ )

| $R^2$            | <i>rs2060793</i> | <i>rs1993116</i> | <i>rs2282679</i> | <i>rs4588</i> | <i>rs1155563</i> | <i>rs7041</i> |
|------------------|------------------|------------------|------------------|---------------|------------------|---------------|
| <i>rs2060793</i> | —                | 0.99             | 0                | 0             | 0                | 0             |
| <i>rs1993116</i> | 0.99             | —                | 0                | 0             | 0                | 0             |
| <i>rs2282679</i> | 0                | 0                | —                | 0.97          | 0.44             | 0.16          |
| <i>rs4588</i>    | 0                | 0                | 0.97             | —             | 0.45             | 0.17          |
| <i>rs1155563</i> | 0                | 0                | 0.44             | 0.45          | —                | 0.03          |
| <i>rs7041</i>    | 0                | 0                | 0.16             | 0.17          | 0.03             | —             |
